# Supplementary material
Source: PubMed Central journal article supplement (PMC2854279)
Supplement: NIHMS178686-supplement-01.pdf [file NIHMS178686-supplement-01.pdf]

**Supplementary Fig.1. Complete list of Hand2-regulated genes.**

| Gene Symbol                                       | Fold Change | Gene Name                                                                                                                 | Functional Class                      | P-value | Affymatrix ID            |
|---------------------------------------------------|-------------|---------------------------------------------------------------------------------------------------------------------------|---------------------------------------|---------|--------------------------|
| Lepr                                              | -30.40      | leptin receptor                                                                                                           | receptor                              | 0.0017  | 1425644_at               |
| Gja5                                              | -23.87      | gap junction membrane channel protein alpha 5; connexin 40                                                                | channels/transporters                 | 0.0150  | 1429101_at               |
| Insm1                                             | -20.70      | insulinoma-associated 1; IA-1                                                                                             | transcription factors                 | 0.0039  | 1455865_at               |
| Ctsl                                              | -20.58      | cathepsin L                                                                                                               | enzymes                               | 0.0050  | 1457724_at               |
| 8030497I03Rik                                     | -18.9       | RIKEN cDNA 8030497I03 gene                                                                                                | unknown                               | 0.0269  | 1442824_at               |
| Amph                                              | -18.8       | amphiphysin                                                                                                               | cytoskeleton                          | 0.0021  | 1427044_a_at             |
| 2810417H13Rik                                     | -16.53      | RIKEN cDNA 2810417H13 gene                                                                                                | unknown                               | 0.0001  | 1419152_at               |
| 9030411K21Rik                                     | -15.77      | RIKEN cDNA 9030411K21 gene                                                                                                | unknown                               | 0.0334  | 1429846_at               |
| Ifnz                                              | -14.86      | interferon zeta                                                                                                           | ligands                               | 0.0140  | 1427216_at               |
| Cdc42bpa                                          | -14.43      | Cdc42 binding protein kinase alpha                                                                                        | kinases/phosphatases                  | 0.0079  | 1442260_at               |
| Nav2                                              | -12.87      | neuron navigator 2                                                                                                        | enzymes                               | 0.0226  | 1441353_at               |
| Prdx2                                             | -12.02      | peroxiredoxin 2                                                                                                           | enzymes                               | 0.0019  | 1430979_a_at             |
| 2700078E11Rik                                     | -11.38      | RIKEN cDNA 2700078E11 gene                                                                                                | enzymes                               | 0.0481  | 1438748_at               |
| Arhgap26                                          | -10.09      | Rho GTPase activating protein 26                                                                                          | GTPases/G protein adaptors/regulators | 0.0043  | 1444128_at               |
| 5730409L17Rik                                     | -9.71       | RIKEN cDNA 5730409L17 gene                                                                                                | unknown                               | 0.0017  | 1431380_at               |
| Khdrbs1                                           | -8.85       | KH domain containing, RNA binding, signal transduction associated 1                                                       | nucleotide binding                    | 0.0082  | 1438462_x_at             |
| 1110030E23Rik                                     | -8.4        | RIKEN cDNA 1110030E23 gene                                                                                                | unknown                               | 0.0344  | 1455219_at               |
| Mid1                                              | -8.26       | midline 1                                                                                                                 | cytoskeleton                          | 0.0272  | 1438239_at               |
| Efhd1                                             | -8.2        | EF hand domain containing 1                                                                                               | adaptors/regulators                   | 0.0437  | 1448507_at               |
| Mtmr7                                             | -6.41       | myotubularin related protein 7                                                                                            | kinases/phosphatases                  | 0.0028  | 1447831_s_at             |
| Prph                                              | -6.41       | peripherin                                                                                                                | receptors                             | 0.0195  | 1422530_at               |
| E030030I06Rik                                     | -6.29       | RIKEN cDNA E030030I06 gene                                                                                                | unknown                               | 0.0288  | 1442156_at               |
| Rgs5                                              | -6.13       | regulator of G-protein signaling 5                                                                                        | GTPases/G protein adaptors/regulators | 0.0127  | 1420940_x_at, 1417466_at |
| 3110045C21Rik                                     | -6.1        | RIKEN cDNA 3110045C21 gene                                                                                                | unknown                               | 0.0138  | 1430401_at               |
| 5730508B09Rik                                     | -5.35       | RIKEN cDNA 5730508B09 gene                                                                                                | unknown                               | 0.0212  | 1447100_s_at             |
| Abcc10                                            | -5.00       | ATP-binding cassette, sub-family C (CFTR/MRP), member 10                                                                  | channels/transporters                 | 0.0252  | 1447476_at               |
| Rpl17                                             | -5          | ribosomal protein L17                                                                                                     | adaptors/regulators                   | 0.0005  | 1453752_at               |
| Rif1                                              | -4.98       | Rap1 interacting factor 1 homolog (yeast)                                                                                 | adaptors/regulators                   | 0.0196  | 1429490_at               |
| Il15                                              | -4.83       | interleukin 15                                                                                                            | ligands                               | 0.0352  | 1418219_at               |
| Ank3                                              | -4.81       | ankyrin 3, epithelial                                                                                                     | cytoskeleton                          | 0.0413  | 1447259_at               |
| Serpinc6b                                         | -4.74       | serine (or cysteine) peptidase inhibitor, clade B, member 6b                                                              | adaptors/regulators                   | 0.0064  | 1422804_at               |
| Mybp1                                             | -4.67       | myosin binding protein C, slow-type                                                                                       | cell adhesion                         | 0.0357  | 1455645_at               |
| Rab6b                                             | -4.67       | RAB6B, member RAS oncogene family                                                                                         | GTPases/G protein adaptors/regulators | 0.0071  | 1434914_at               |
| Efhd2                                             | -4.57       | EF hand domain containing 2                                                                                               | adaptors/regulators                   | 0.0014  | 1437478_s_at             |
| C80913                                            | -4.52       | expressed sequence C80913                                                                                                 | unknown                               | 0.0005  | 1433913_at               |
| BC005512 /// EG641366 /// LOC215866 /// LOC629242 | -4.52       | cDNA sequence BC005512 /// hypothetical protein LOC215866 /// hypothetical protein LOC629242 /// predicted gene, EG641366 | unknown                               | 0.0426  | 1435628_x_at             |
| Ang                                               | -4.50       | angiogenin, ribonuclease, RNase A family, 5                                                                               | enzymes                               | 0.0182  | 1438936_s_at             |
| Fam132a                                           | -4.48       | family with sequence similarity 132, member A                                                                             | unknown                               | 0.0007  | 1439422_a_at             |
| LOC553091                                         | -4.39       | hypothetical LOC553091                                                                                                    | unknown                               | 0.0009  | 1456130_at               |

|                    |       |                                                                                                |                                              |               |                               |
|--------------------|-------|------------------------------------------------------------------------------------------------|----------------------------------------------|---------------|-------------------------------|
| Epcam              | -4.27 | epithelial cell adhesion molecule                                                              | cell adhesion                                | 0.0303        | 1447899_x_at                  |
| Upk1b              | -4.15 | uroplakin 1B                                                                                   | receptors                                    | 0.0319        | 1435831_at                    |
| Pcdh9              | -4.07 | protocadherin 9                                                                                | cell adhesion                                | 0.0200        | 1429861_at                    |
| Gins1              | -4.00 | GINS complex subunit 1 (Psf1 homolog)                                                          | nucleotide binding                           | 0.0212        | 1457981_x_at                  |
| Eme2               | -3.97 | essential meiotic endonuclease 1 homolog 2 (S. pombe)                                          | enzymes                                      | 0.0102        | 1460628_at                    |
| Pdgfd              | -3.89 | platelet-derived growth factor, D polypeptide                                                  | ligands                                      | 0.0118        | 1456532_at                    |
| Pcdh21             | -3.82 | protocadherin 21                                                                               | cell adhesion                                | 0.0116        | 1418304_at                    |
| C79461             | -3.75 | expressed sequence C79461                                                                      | unknown                                      | 0.0095        | 1445973_at                    |
| Foxc1              | -3.73 | forkhead box C1                                                                                | transcription factors                        | 0.0248        | 1419485_at                    |
| Akr1e1             | -3.68 | aldo-keto reductase family 1, member E1                                                        | enzymes                                      | 0.0158        | 1417826_at                    |
| AU044157           | -3.65 | expressed sequence AU044157                                                                    | unknown                                      | 0.0424        | 1441151_at                    |
| Trim34             | -3.57 | tripartite motif-containing 34                                                                 | adaptors/regulators                          | 0.0116        | 1424857_a_at                  |
| ENSMUSG00000073738 | -3.55 | predicted gene, ENSMUSG00000073738                                                             | unknown                                      | 0.0058        | 1439816_at                    |
| OTTMUSG00000010657 | -3.45 | predicted gene, OTTMUSG00000010657                                                             | unknown                                      | 0.0006        | 1424784_at                    |
| Meox1              | -3.44 | mesenchyme homeobox 1                                                                          | transcription factors                        | 0.0317        | 1417595_at                    |
| Galc               | -3.36 | galactosylceramidase                                                                           | enzymes                                      | 0.0115        | 1452907_at                    |
| Snx6               | -3.32 | sorting nexin 6                                                                                | channels/transporters                        | 0.0066        | 1451602_at                    |
| Sox11              | -3.31 | <i>SRY-box containing gene 11</i>                                                              | <i>transcription factors</i>                 |               | 1431225_at, 1453002_at        |
| Pcp4               | -3.3  | Purkinje cell protein 4                                                                        | adaptors/regulators                          | 0.0217        | 1460214_at                    |
| Cenpa              | -3.27 | Centromere protein A                                                                           | nucleotide binding                           | 0.0209        | 1444416_at                    |
| 0610007P08Rik      | -3.27 | RIKEN cDNA 0610007P08 gene                                                                     | nucleotide binding                           | 0.0195        | 1453985_at                    |
| A730017C20Rik      | -3.27 | RIKEN cDNA A730017C20 gene                                                                     | unknown                                      | 0.0234        | 1437528_x_at                  |
| Rala               | -3.19 | v-ral simian leukemia viral oncogene homolog A (ras related)                                   | GTPases/G protein adaptors/regulators        | 0.0059        | 1450870_at                    |
| Adams18            | -3.17 | a disintegrin-like and metallopeptidase (reprolysin type) with thrombospondin type 1 motif, 18 | enzymes                                      | 0.0434        | 1437574_at                    |
| Wfdc2              | -3.11 | WAP four-disulfide core domain 2                                                               | adaptors/regulators                          | 0.0303        | 1424351_at                    |
| Mdf1               | -3.1  | MyoD family inhibitor                                                                          | transcription factors                        | 0.0043        | 1420713_a_at                  |
| BC053393           | -3.1  | cDNA sequence BC053393                                                                         | unknown                                      | 0.0230        | 1447604_at                    |
| Garnl3             | -3.09 | GTPase activating RANGAP domain-like 3                                                         | GTPases/G protein adaptors/regulators        | 0.0107        | 1433553_at                    |
| Tns3               | -3.08 | tensin 3                                                                                       | kinases/phosphatases                         | 0.0289        | 1446636_at                    |
| Stk25              | -3.06 | serine/threonine kinase 25 (yeast)                                                             | kinases/phosphatases                         | 0.0454        | 1416770_at                    |
| Lgals7 /// Samd4   | -3.01 | lectin, galactose binding, soluble 7 /// sterile alpha motif domain containing 4               | cell adhesion                                | 0.0101        | 1436356_at                    |
| Bach2              | -3.00 | BTB and CNC homology 2                                                                         | transcription factors                        | 0.0027        | 1437667_a_at                  |
| Mxra7              | -3    | matrix-remodelling associated 7                                                                | unknown                                      | 0.0374        | 1440975_at                    |
| Tmeff2             | -2.99 | transmembrane protein with EGF-like and two follistatin-like domains 2                         | unknown                                      | 0.0081        | 1419073_at                    |
| 2610035D17Rik      | -2.98 | RIKEN cDNA 2610035D17 gene                                                                     | unknown                                      | 0.0332        | 1453261_at                    |
| Usp43              | -2.97 | ubiquitin specific peptidase 43                                                                | enzymes                                      | 0.0096        | 1424866_at                    |
| 5430405H02Rik      | -2.97 | RIKEN cDNA 5430405H02 gene                                                                     | unknown                                      | 0.0232        | 1430366_at                    |
| Unc13c             | -2.96 | unc-13 homolog C (C. elegans)                                                                  | receptors                                    | 0.0051        | 1455304_at                    |
| Dlc1               | -2.93 | <i>deleted in liver cancer 1</i>                                                               | <i>GTPases/G protein adaptors/regulators</i> | <i>0.0202</i> | <i>1436173_at, 1450206_at</i> |
| G730007D18Rik      | -2.92 | RIKEN cDNA G730007D18 gene                                                                     | unknown                                      | 0.0059        | 1442120_at                    |
| LOC552908          | -2.89 | hypothetical LOC552908                                                                         | unknown                                      | 0.0269        | 1442213_at                    |
| Dsp                | -2.86 | desmoplakin                                                                                    | cytoskeleton                                 | 0.0100        | 1435493_at                    |
| Kcnj11             | -2.80 | potassium inwardly rectifying channel, subfamily J, member 11                                  | channels/transporters                        | 0.0241        | 1455417_at                    |

|                                           |       |                                                                                                                               |                       |        |                          |
|-------------------------------------------|-------|-------------------------------------------------------------------------------------------------------------------------------|-----------------------|--------|--------------------------|
| Tgif2                                     | -2.80 | TGFB-induced factor 2                                                                                                         | transcription factors | 0.0494 | 1431115_at               |
| Pmaip1                                    | -2.8  | phorbol-12-myristate-13-acetate-induced protein 1                                                                             | unknown               | 0.0071 | 1418203_at               |
| Zfp593                                    | -2.79 | zinc finger protein 593                                                                                                       | nucleotide binding    | 0.0055 | 1447703_x_at             |
| Zkscan3                                   | -2.79 | zinc finger with KRAB and SCAN domains 3                                                                                      | transcription factors | 0.0499 | 1437892_at               |
| BC002163 /// Ndufs5                       | -2.75 | cDNA sequence BC002163 /// NADH dehydrogenase (ubiquinone) Fe-S protein 5                                                     | enzymes               | 0.0107 | 1416494_at               |
| Coro2b                                    | -2.74 | coronin, actin binding protein, 2B                                                                                            | cytoskeleton          | 0.0087 | 1434326_x_at             |
| Asah3l                                    | -2.74 | N-acylsphingosine amidohydrolase 3-like                                                                                       | enzymes               | 0.0345 | 1421496_at               |
| 9030425E11Rik                             | -2.67 | RIKEN cDNA 9030425E11 gene                                                                                                    | cell adhesion         |        | 1448250_at, 1448251_at   |
| Hist2h2be                                 | -2.67 | histone cluster 2, H2be                                                                                                       | nucleotide binding    | 0.0064 | 1447854_s_at             |
| Pclo                                      | -2.65 | piccolo (presynaptic cytomatrix protein)                                                                                      | cytoskeleton          | 0.0001 | 1419392_at               |
| Rfxank                                    | -2.65 | regulatory factor X-associated ankyrin-containing protein                                                                     | transcription factors | 0.0060 | 1455371_at               |
| Spata5l1                                  | -2.63 | spermatogenesis associated 5-like 1                                                                                           | unknown               | 0.0216 | 1455863_at               |
| 2610528B01Rik                             | -2.62 | RIKEN cDNA 2610528B01 gene                                                                                                    | unknown               | 0.0012 | 1429232_at               |
| Anxa6                                     | -2.6  | annexin A6                                                                                                                    | cytoskeleton          | 0.0184 | 1429247_at               |
| D5Erd255e                                 | -2.57 | DNA segment, Chr 5, ERATO Doi 255, expressed                                                                                  | unknown               | 0.0371 | 1447526_at               |
| Atp1a2                                    | -2.56 | ATPase, Na <sup>+</sup> /K <sup>+</sup> transporting, alpha 2 polypeptide                                                     | channels/transporters |        | 1434893_at, 1427465_at   |
| 1110018J18Rik                             | -2.56 | RIKEN cDNA 1110018J18 gene                                                                                                    | unknown               | 0.0039 | 1434441_at               |
| Sostdc1                                   | -2.55 | sclerostin domain containing 1                                                                                                | ligands               | 0.0139 | 1460250_at               |
| H3f3b                                     | -2.55 | H3 histone, family 3B                                                                                                         | nucleotide binding    | 0.0178 | 1430357_at               |
| Gli3                                      | -2.54 | GLI-Kruppel family member GLI3                                                                                                | transcription factors | 0.0312 | 1456067_at               |
| Stox2                                     | -2.54 | storkhead box 2                                                                                                               | unknown               | 0.0319 | 1436166_at               |
| Tmem18                                    | -2.54 | transmembrane protein 18                                                                                                      | unknown               | 0.0032 | 1454836_at               |
| Unc84b                                    | -2.53 | unc-84 homolog B (C. elegans)                                                                                                 | cytoskeleton          | 0.0483 | 1439238_at               |
| 3110007F17Rik                             | -2.53 | RIKEN cDNA 3110007F17 gene                                                                                                    | unknown               | 0.0219 | 1439279_at               |
| 6720475J19Rik                             | -2.49 | RIKEN cDNA 6720475J19 gene                                                                                                    | unknown               |        | 1423071_x_at, 1423072_at |
| 2210020M01Rik                             | -2.49 | RIKEN cDNA 2210020M01 gene                                                                                                    | unknown               | 0.0007 | 1435378_at               |
| Eps8                                      | -2.48 | epidermal growth factor receptor pathway substrate 8                                                                          | adaptors/regulators   | 0.0385 | 1422824_s_at             |
| Foxp2                                     | -2.45 | forkhead box P2                                                                                                               | transcription factors | 0.0368 | 1438231_at               |
| Cbln1                                     | -2.44 | cerebellin 1 precursor protein                                                                                                | cell adhesion         | 0.0281 | 1423286_at               |
| Etaa1                                     | -2.44 | Ewing's tumor-associated antigen 1                                                                                            | unknown               | 0.0064 | 1457882_at               |
| 2700079J08Rik /// Ccrn4l /// LOC100043775 | -2.44 | CCR4 carbon catabolite repression 4-like (S. cerevisiae) /// RIKEN cDNA 2700079J08 gene /// hypothetical protein LOC100043775 | unknown               | 0.0099 | 1436362_x_at             |
| Nav1                                      | -2.43 | Neuron navigator 1                                                                                                            | cytoskeleton          | 0.0036 | 1455849_at               |
| Cox6a2                                    | -2.43 | cytochrome c oxidase, subunit VI a, polypeptide 2                                                                             | enzymes               | 0.0443 | 1457633_x_at             |
| Ptprg                                     | -2.43 | protein tyrosine phosphatase, receptor type, G                                                                                | receptors             | 0.0026 | 1429691_at               |
| 1500015A07Rik                             | -2.42 | RIKEN cDNA 1500015A07 gene                                                                                                    | unknown               | 0.0089 | 1429162_at               |
| LOC100040515                              | -2.42 | Hypothetical protein LOC100040515                                                                                             | unknown               | 0.0258 | 1446812_at               |
| Nrxn1                                     | -2.41 | neurexin I                                                                                                                    | cell adhesion         | 0.0496 | 1454691_at               |
| Stk38l                                    | -2.38 | serine/threonine kinase 38 like                                                                                               | kinases/phosphatases  | 0.0194 | 1435878_at               |
| Efha2                                     | -2.38 | EF-hand domain family, member A2                                                                                              | unknown               | 0.0121 | 1435400_at               |
| Sulf1                                     | -2.35 | sulfatase 1                                                                                                                   | enzymes               | 0.0260 | 1436319_at               |
| Pdpm                                      | -2.34 | podoplanin                                                                                                                    | cell adhesion         | 0.0164 | 1419309_at               |
| Cadps                                     | -2.34 | Ca <sup>2+</sup> -dependent secretion activator                                                                               | adaptors/regulators   | 0.0042 | 1448955_s_at             |
| Pcdhb3                                    | -2.32 | protocadherin beta 3                                                                                                          | cell adhesion         | 0.0425 | 1420429_at               |

|                         |       |                                                                                                                        |                                       |        |                                 |
|-------------------------|-------|------------------------------------------------------------------------------------------------------------------------|---------------------------------------|--------|---------------------------------|
| Rgnef                   | -2.32 | Rho-guanine nucleotide exchange factor                                                                                 | GTPases/G protein adaptors/regulator: | 0.0331 | 1419457_at                      |
| Sept2                   | -2.31 | septin 2                                                                                                               | cytoskeleton                          | 0.0341 | 1423473_at                      |
| 4933436C20Rik           | -2.31 | RIKEN cDNA 4933436C20 gene                                                                                             | unknown                               | 0.0340 | 1431297_a_at                    |
| 1700013G23Rik           | -2.31 | RIKEN cDNA 1700013G23 gene                                                                                             | unknown                               | 0.0064 | 1438378_at                      |
| Sbk1                    | -2.30 | SH3-binding kinase 1                                                                                                   | kinases/phosphatases                  | 0.0053 | 1423978_at                      |
| Rabl4                   | -2.29 | RAB, member of RAS oncogene family-like 4                                                                              | GTPases/G protein adaptors/regulator: | 0.0023 | 1434299_x_at                    |
| Tgfb1                   | -2.29 | <i>transforming growth factor, beta induced</i>                                                                        | <i>ligands</i>                        | 0.0014 | 3_s_at, 1415871_at, 145621      |
| Nfatc2                  | -2.29 | nuclear factor of activated T-cells, cytoplasmic, calcineurin-dependent 2                                              | transcription factors                 | 0.0370 | 1439205_at                      |
| Cenpk                   | -2.28 | centromere protein K                                                                                                   | adaptors/regulators                   | 0.0183 | 1457001_at                      |
| Sost                    | -2.27 | sclerostin                                                                                                             | <i>ligands</i>                        | 0.0471 | 1450179_at                      |
| H2afv                   | -2.27 | <i>H2A histone family, member V</i>                                                                                    | <i>nucleotide binding</i>             |        | 1428029_a_at, 1436596_at        |
| Fam115a                 | -2.26 | family with sequence similarity 115, member A                                                                          | unknown                               | 0.0189 | 1428541_at                      |
| 1700086O06Rik           | -2.26 | RIKEN cDNA 1700086O06 gene                                                                                             | unknown                               | 0.0466 | 1443633_at                      |
| Nudt7                   | -2.25 | nudix (nucleoside diphosphate linked moiety X)-type motif 7                                                            |                                       | 0.0036 | 1430896_s_at                    |
| 6230424C14Rik           | -2.25 | RIKEN cDNA 6230424C14 gene                                                                                             | enzymes                               | 0.0413 | 1429543_at                      |
| Fgd6                    | -2.25 | FYVE, RhoGEF and PH domain containing 6                                                                                | GTPases/G protein adaptors/regulator: | 0.0058 | 1435467_at                      |
| Thap4                   | -2.25 | THAP domain containing 4                                                                                               | <i>nucleotide binding</i>             | 0.0275 | 1447754_x_at                    |
| Zfr                     | -2.25 | zinc finger RNA binding protein                                                                                        | <i>nucleotide binding</i>             | 0.0311 | 1449552_at                      |
| Zfp617                  | -2.25 | zinc finger protein 617                                                                                                | transcription factors                 | 0.0375 | 1449546_a_at                    |
| Cbln4                   | -2.24 | cerebellin 4 precursor protein                                                                                         |                                       | 0.0342 | 1433607_at                      |
| Txn14a                  | -2.23 | thioredoxin-like 4A                                                                                                    | <i>nucleotide binding</i>             | 0.0009 | 1419179_at                      |
| Hspa1b                  | -2.23 | <i>heat shock protein 1B</i>                                                                                           | adaptors/regulators                   |        | 1452318_a_at, 1427126_at, 14271 |
| Tial1                   | -2.22 | Tia1 cytotoxic granule-associated RNA binding protein-like 1                                                           | <i>nucleotide binding</i>             | 0.0125 | 1426352_s_at                    |
| Lca5l /// LOC100044994  | -2.21 | Leber congenital amaurosis 5-like /// hypothetical protein<br>LOC100044994                                             | unknown                               | 0.0203 | 1436086_at                      |
| 1600012F09Rik           | -2.21 | RIKEN cDNA 1600012F09 gene                                                                                             | unknown                               | 0.0275 | 1449557_at                      |
| EG546524                | -2.2  | predicted gene, EG546524                                                                                               | unknown                               | 0.0114 | 1448012_at                      |
| Ankrd6                  | -2.19 | ankyrin repeat domain 6                                                                                                | cytoskeleton                          | 0.0363 | 1437217_at                      |
| Vamp3                   | -2.19 | vesicle-associated membrane protein 3                                                                                  | adaptors/regulators                   | 0.0191 | 1437708_x_at                    |
| Slain1                  | -2.19 | SLAIN motif family, member 1                                                                                           | unknown                               | 0.0344 | 1424824_at                      |
| Rhpn2                   | -2.18 | rhopilin, Rho GTPase binding protein 2                                                                                 | cytoskeleton                          | 0.0046 | 1431805_a_at                    |
| Car8 /// LOC676792      | -2.18 | carbonic anhydrase 8 /// similar to Carbonic anhydrase-related protein (CARP) (CA-VIII)                                | enzymes                               | 0.0119 | 1427482_a_at                    |
| Ccnj1                   | -2.18 | cyclin J-like                                                                                                          | kinases/phosphatases                  | 0.0433 | 1456168_at                      |
| Cxcl12                  | -2.18 | <i>chemokine (C-X-C motif) ligand 12</i>                                                                               | <i>ligands</i>                        | 0.0061 | 1448823_at, 1417574_at          |
| Stau1                   | -2.18 | stau1 (RNA binding protein) homolog 1 (Drosophila)                                                                     | <i>nucleotide binding</i>             | 0.0002 | 1435347_at                      |
| Arap3                   | -2.17 | ArfGAP with RhoGAP domain, ankyrin repeat and PH domain 3                                                              | GTPases/G protein adaptors/regulator: | 0.0145 | 1419833_s_at                    |
| Camk2a                  | -2.17 | calcium/calmodulin-dependent protein kinase II alpha                                                                   | kinases/phosphatases                  | 0.0388 | 1457311_at                      |
| Mreg                    | -2.17 | melanoregulin                                                                                                          | unknown                               | 0.0246 | 1437250_at                      |
| Zfp503                  | -2.17 | zinc finger protein 503                                                                                                | unknown                               | 0.0195 | 1423836_at                      |
| Adam19 /// LOC100045780 | -2.16 | a disintegrin and metalloproteinase domain 19 (meltrin beta) /// similar to metalloproteinase-disintegrin meltrin beta | enzymes                               | 0.0079 | 1418402_at                      |
| Ube2j2                  | -2.16 | ubiquitin-conjugating enzyme E2, J2 homolog (yeast)                                                                    | enzymes                               | 0.0450 | 1430317_at                      |
| Usp38                   | -2.16 | ubiquitin specific peptidase 38                                                                                        | enzymes                               | 0.0060 | 1428592_s_at                    |
| Hoxa3                   | -2.15 | homeo box A3                                                                                                           | transcription factors                 | 0.0206 | 1427433_s_at                    |

|                                                                                              |       |                                                                                                                                                                            |                                       |        |                               |
|----------------------------------------------------------------------------------------------|-------|----------------------------------------------------------------------------------------------------------------------------------------------------------------------------|---------------------------------------|--------|-------------------------------|
| Cacna2d1                                                                                     | -2.14 | calcium channel, voltage-dependent, alpha2/delta subunit 1                                                                                                                 | channels/transporters                 | 0.0430 | 1440397_at                    |
| Serhl                                                                                        | -2.14 | serine hydrolase-like                                                                                                                                                      | enzymes                               | 0.0437 | 1434145_s_at                  |
| Ltbp1                                                                                        | -2.13 | latent transforming growth factor beta binding protein 1                                                                                                                   | cell adhesion                         | 0.0371 | 1447547_at                    |
| Scn2b                                                                                        | -2.13 | sodium channel, voltage-gated, type II, beta                                                                                                                               | channels/transporters                 | 0.0138 | 1430648_at                    |
| Tulp4                                                                                        | -2.13 | tubby like protein 4                                                                                                                                                       | unknown                               | 0.0196 | 1434585_at                    |
| Syt11                                                                                        | -2.12 | synaptotagmin XI                                                                                                                                                           | receptors                             | 0.0071 | 1455176_a_at                  |
| Rtn1                                                                                         | -2.12 | reticulon 1                                                                                                                                                                | adaptors/regulators                   | 0.0209 | 1429761_at                    |
| Pard3                                                                                        | -2.11 | par-3 (partitioning defective 3) homolog (C. elegans)                                                                                                                      | cell adhesion                         | 0.0304 | 1420391_at                    |
| B3galnt1                                                                                     | -2.11 | UDP-GalNAc:betaGlcNAc beta 1,3-galactosaminyltransferase, polypeptide 1                                                                                                    | enzymes                               | 0.0051 | 1418736_at                    |
| Rnf216                                                                                       | -2.11 | Ring finger protein 216                                                                                                                                                    | enzymes                               | 0.0162 | 1458507_at                    |
| Ctdspl                                                                                       | -2.11 | CTD (carboxy-terminal domain, RNA polymerase II, polypeptide A) small phosphatase-like                                                                                     | kinases/phosphatases                  | 0.0117 | 1422510_at                    |
| Nr4a2                                                                                        | -2.11 | nuclear receptor subfamily 4, group A, member 2                                                                                                                            | transcription factors                 | 0.0258 | 1455034_at                    |
| Vps41                                                                                        | -2.11 | vacuolar protein sorting 41 (yeast)                                                                                                                                        | adaptors/regulators                   | 0.0035 | 1437901_a_at                  |
| 1110005A03Rik                                                                                | -2.11 | RIKEN cDNA 1110005A03 gene                                                                                                                                                 | unknown                               |        | 1453485_s_at,<br>1451448_a_at |
| Diras2                                                                                       | -2.1  | DIRAS family, GTP-binding RAS-like 2                                                                                                                                       | GTPases/G protein adaptors/regulators | 0.0104 | 1455436_at                    |
| Bub1                                                                                         | -2.10 | budding uninhibited by benzimidazoles 1 homolog (S. cerevisiae)                                                                                                            | kinases/phosphatases                  | 0.0221 | 1438571_at                    |
| Hist1h2bb /// Hist1h2bc ///<br>Hist1h2be /// Hist1h2bg ///<br>LOC665622 /// RP23-<br>38E20.1 | -2.10 | histone cluster 1, H2bc /// histone cluster 1, H2bb /// histone cluster 1, H2be /// histone cluster 1, H2bg /// H2b histone family, member A /// H2b histone family member | nucleotide binding                    | 0.0240 | 1418072_at                    |
| Slc35a5                                                                                      | -2.09 | solute carrier family 35, member A5; nucleotide-sugar transporter family                                                                                                   | channels/transporters                 | 0.0019 | 1419971_s_at                  |
| Dctn4                                                                                        | -2.09 | dynactin 4                                                                                                                                                                 | cytoskeleton                          | 0.0146 | 1458541_at                    |
| Cask                                                                                         | -2.09 | calcium/calmodulin-dependent serine protein kinase (MAGUK family)                                                                                                          | kinases/phosphatases                  | 0.0028 | 1422518_at                    |
| Fam89a                                                                                       | -2.09 | family with sequence similarity 89, member A                                                                                                                               | unknown                               | 0.0410 | 1427356_at                    |
| Col11a1                                                                                      | -2.08 | collagen, type XI, alpha 1                                                                                                                                                 | cell adhesion                         | 0.0132 | 1418599_at, 1449154_at        |
| Rerg                                                                                         | -2.08 | RAS-like, estrogen-regulated, growth-inhibitor                                                                                                                             | GTPases/G protein adaptors/regulators | 0.0403 | 1451236_at                    |
| Rgs2                                                                                         | -2.08 | regulator of G-protein signaling 2                                                                                                                                         | GTPases/G protein adaptors/regulators | 0.0111 | 1447830_s_at                  |
| Ssr1                                                                                         | -2.08 | signal sequence receptor, alpha; translocon-associated protein (TRAP), alpha                                                                                               | adaptors/regulators                   | 0.0196 | 1441327_a_at                  |
| Tmem66                                                                                       | -2.08 | transmembrane protein 66                                                                                                                                                   | unknown                               | 0.0081 | 1424039_at                    |
| LOC100047339                                                                                 | -2.07 | similar to lysyl oxidase-like 2                                                                                                                                            | cell adhesion                         | 0.0158 | 1431004_at                    |
| Pcmt1                                                                                        | -2.07 | protein-L-isoaspartate (D-aspartate) O-methyltransferase 1                                                                                                                 | enzymes                               | 0.0492 | 1431086_s_at                  |
| Mthfd2l                                                                                      | -2.07 | methylenetetrahydrofolate dehydrogenase (NADP+ dependent) 2-like                                                                                                           | enzymes                               | 0.0311 | 1429600_at                    |
| Spag1                                                                                        | -2.07 | sperm associated antigen 1                                                                                                                                                 | adaptors/regulators                   | 0.0453 | 1419588_at                    |
| 2900054J07Rik                                                                                | -2.07 | RIKEN cDNA 2900054J07 gene                                                                                                                                                 | unknown                               | 0.0208 | 1439869_at                    |
| 2610021K21Rik                                                                                | -2.06 | RIKEN cDNA 2610021K21 gene                                                                                                                                                 | adaptors/regulators                   | 0.0231 | 1430339_at                    |
| Rpl21                                                                                        | -2.06 | ribosomal protein L21                                                                                                                                                      | adaptors/regulators                   | 0.0380 | 1423070_at                    |
| Lipa                                                                                         | -2.05 | lysosomal acid lipase A                                                                                                                                                    | enzymes                               | 0.0431 | 1423140_at                    |
| Zfp697                                                                                       | -2.05 | zinc finger protein 697                                                                                                                                                    | transcription factors                 | 0.0077 | 1440999_at                    |

|                                                        |       |                                                                                                                                                                                      |                                       |        |                            |
|--------------------------------------------------------|-------|--------------------------------------------------------------------------------------------------------------------------------------------------------------------------------------|---------------------------------------|--------|----------------------------|
| Tanc2                                                  | -2.04 | tetratricopeptide repeat, ankyrin repeat and coiled-coil containing 2                                                                                                                | cytoskeleton                          | 0.0288 | 1436513_at                 |
| Igf2r                                                  | -2.04 | insulin-like growth factor 2 receptor                                                                                                                                                | receptors                             | 0.0465 | 1424111_at                 |
| Aph1b                                                  | -2.04 | anterior pharynx defective 1b homolog (C. elegans)                                                                                                                                   | adaptors/regulators                   | 0.0291 | 1435793_at                 |
| Rabif                                                  | -2.03 | RAB interacting factor                                                                                                                                                               | GTPases/G protein adaptors/regulators | 0.0389 | 1457969_at                 |
| Gpr116                                                 | -2.03 | G protein-coupled receptor 116                                                                                                                                                       | receptors                             | 0.0233 | 1440830_at                 |
| Rps6                                                   | -2.03 | ribosomal protein S6                                                                                                                                                                 | adaptors/regulators                   | 0.0289 | 1416142_at                 |
| Cdh5                                                   | -2.02 | cadherin 5                                                                                                                                                                           | cell adhesion                         | 0.0202 | 1433956_at                 |
| Col23a1                                                | -2.02 | collagen, type XXIII, alpha 1                                                                                                                                                        | cell adhesion                         | 0.0429 | 1429210_at                 |
| Rims1                                                  | -2.02 | regulating synaptic membrane exocytosis 1                                                                                                                                            | cytoskeleton                          | 0.0243 | 1438305_at                 |
| Mmp14                                                  | -2.02 | matrix metalloproteinase 14 (membrane-inserted)                                                                                                                                      | enzymes                               | 0.0041 | 1448383_at                 |
| Olfml3                                                 | -2.02 | olfactomedin-like 3                                                                                                                                                                  | unknown                               | 0.0108 | 1448475_at                 |
| 2410002O22Rik                                          | -2.02 | RIKEN cDNA 2410002O22 gene                                                                                                                                                           | unknown                               | 0.0040 | 1418667_at                 |
| Fry                                                    | -2.00 | furry homolog (Drosophila)                                                                                                                                                           | cytoskeleton                          | 0.0190 | 1456480_at                 |
| Trmt1                                                  | -2.00 | TRM1 tRNA methyltransferase 1 homolog (S. cerevisiae)                                                                                                                                | enzymes                               | 0.0032 | 1436494_x_at               |
| Purg                                                   | -2.00 | purine-rich element binding protein G                                                                                                                                                | nucleotide binding                    | 0.0035 | 1452029_a_at               |
| Heyl                                                   | -2.00 | hairy/enhancer-of-split related with YRPW motif-like                                                                                                                                 | transcription factors                 | 0.0184 | 1419302_at                 |
| Gm1673                                                 | -2    | gene model 1673, (NCBI)                                                                                                                                                              | unknown                               | 0.0468 | 1434498_at                 |
| Mapk8                                                  | 2.00  | mitogen-activated protein kinase 8                                                                                                                                                   | enzymes                               | 0.0390 | 1457936_at                 |
| Elov3                                                  | 2.01  | elongation of very long chain fatty acids (FEN1/Elo2, SUR4/Elo3, yeast)-like 3                                                                                                       | enzymes                               | 0.0157 | 1420722_at                 |
| Metap2                                                 | 2.01  | methionine aminopeptidase 2                                                                                                                                                          | enzymes                               | 0.0220 | 1451048_at                 |
| Rbm8a                                                  | 2.01  | RNA binding motif protein 8a                                                                                                                                                         | nucleotide binding                    | 0.0488 | 1418120_at                 |
| Map3k10                                                | 2.02  | mitogen-activated protein kinase kinase kinase 10                                                                                                                                    | kinases/phosphatases                  | 0.0220 | 1436373_at                 |
| 4933403F05Rik                                          | 2.02  | RIKEN cDNA 4933403F05 gene                                                                                                                                                           | unknown                               | 0.0334 | 1443873_at                 |
| 2210404J11Rik ///<br>9030025P20Rik ///<br>LOC100041621 | 2.03  | RIKEN cDNA 2210404J11 gene /// RIKEN cDNA 9030025P20 gene /// hypothetical protein LOC100041621                                                                                      | unknown                               | 0.0068 | 1431007_at                 |
| 2310035C23Rik                                          | 2.04  | RIKEN cDNA 2310035C23 gene                                                                                                                                                           | adaptors/regulators                   | 0.0331 | 1430126_at                 |
| Mtm1                                                   | 2.05  | X-linked myotubular myopathy gene 1                                                                                                                                                  | kinases/phosphatases                  | 0.0426 | 1454904_at                 |
| Stat5b                                                 | 2.05  | signal transducer and activator of transcription 5B                                                                                                                                  | transcription factors                 | 0.0471 | 1422102_a_at               |
| Tceb3                                                  | 2.05  | transcription elongation factor B (SIII), polypeptide 3                                                                                                                              | adaptors/regulators                   | 0.0178 | 1450676_at                 |
| Lpin2                                                  | 2.06  | lipin 2                                                                                                                                                                              | enzymes                               | 0.0091 | 1460290_at                 |
| Pttg1                                                  | 2.06  | <i>pituitary tumor-transforming 1; securin</i>                                                                                                                                       | <i>transcription factors</i>          |        | 1438390_s_at, 1424105_a_at |
| 4930535I16Rik                                          | 2.06  | RIKEN cDNA 4930535I16 gene                                                                                                                                                           | unknown                               | 0.0267 | 1430608_at                 |
| Tmem37                                                 | 2.09  | transmembrane protein 37                                                                                                                                                             | channels/transporters                 | 0.0340 | 1417611_at                 |
| Ppp1cb                                                 | 2.09  | protein phosphatase 1, catalytic subunit, beta isoform                                                                                                                               | kinases/phosphatases                  | 0.0301 | 1431328_at                 |
| Hdhd3                                                  | 2.1   | haloacid dehalogenase-like hydrolase domain containing 3                                                                                                                             | kinases/phosphatases                  | 0.0131 | 1425343_at                 |
| Cyt11                                                  | 2.10  | cytokine like 1                                                                                                                                                                      | ligands                               | 0.0053 | 1456793_at                 |
| Ywhag                                                  | 2.1   | tyrosine 3-monooxygenase/tryptophan 5-monooxygenase activation protein, gamma polypeptide                                                                                            | adaptors/regulators                   | 0.0249 | 1420816_at                 |
| Nol9                                                   | 2.1   | nucleolar protein 9                                                                                                                                                                  | unknown                               | 0.0071 | 1432218_a_at               |
| Atic /// LOC100046995                                  | 2.11  | 5-aminoimidazole-4-carboxamide ribonucleotide formyltransferase/IMP cyclohydrolase /// similar to 5-aminoimidazole-4-carboxamide ribonucleotide formyltransferase/IMP cyclohydrolase | enzymes                               | 0.0096 | 1452811_at                 |
| Pi4k2b                                                 | 2.11  | phosphatidylinositol 4-kinase type 2 beta                                                                                                                                            | kinases/phosphatases                  | 0.0168 | 1420411_a_at               |

|               |      |                                                              |                                       |        |                          |
|---------------|------|--------------------------------------------------------------|---------------------------------------|--------|--------------------------|
| Ssu72         | 2.11 | Ssu72 RNA polymerase II CTD phosphatase homolog (yeast)      | kinases/phosphatases                  | 0.0193 | 1441282_at               |
| Pabpc4l       | 2.11 | poly(A) binding protein, cytoplasmic 4-like                  | unknown                               | 0.0386 | 1431353_at               |
| Arhgef11      | 2.13 | Rho guanine nucleotide exchange factor (GEF) 11              | GTPases/G protein adaptors/regulators | 0.0267 | 1443539_at               |
| Cyp2d22       | 2.14 | cytochrome P450, family 2, subfamily d, polypeptide 22       | enzymes                               | 0.0206 | 1419039_at               |
| Nup160        | 2.15 | nucleoporin 160                                              | unknown                               | 0.0308 | 1444892_at               |
| Eif2ak1       | 2.16 | eukaryotic translation initiation factor 2 alpha kinase 1    | kinases/phosphatases                  | 0.0281 | 1436006_at               |
| Brc3          | 2.16 | BRCA1/BRCA2-containing complex, subunit 3                    | adaptors/regulators                   | 0.0476 | 1426605_at               |
| A930005H10Rik | 2.16 | RIKEN cDNA A930005H10 gene                                   | unknown                               | 0.0020 | 1441263_a_at             |
| Lonrf3        | 2.17 | LON peptidase N-terminal domain and ring finger 3            | unknown                               | 0.0490 | 1429863_at               |
| Zfp64         | 2.21 | zinc finger protein 64                                       | adaptors/regulators                   | 0.0042 | 1430117_a_at             |
| Clock         | 2.22 | circadian locomotor output cycles kaput                      | transcription factors                 | 0.0102 | 1439314_at               |
| Trim8         | 2.24 | Tripartite motif protein 8                                   | adaptors/regulators                   | 0.0426 | 1438679_at               |
| Isoc1         | 2.26 | isochorismatase domain containing 1                          | enzymes                               | 0.0010 | 1425050_at               |
| Heatr1        | 2.27 | HEAT repeat containing 1                                     | adaptors/regulators                   | 0.0047 | 1452419_at               |
| Hddc3         | 2.28 | HD domain containing 3                                       | enzymes                               | 0.0456 | 1428692_at               |
| C130021I20Rik | 2.29 | Riken cDNA C130021I20 gene                                   | unknown                               | 0.0239 | 1455416_at               |
| Kras          | 2.35 | v-Ki-ras2 Kirsten rat sarcoma viral oncogene homolog         | GTPases/G protein adaptors/regulators | 0.0010 | 1426229_s_at             |
| Cdy12         | 2.42 | chromodomain protein, Y chromosome-like 2                    | unknown                               | 0.0027 | 1431139_at               |
| Gosr1         | 2.44 | golgi SNAP receptor complex member 1                         | channels/transporters                 | 0.0087 | 1448256_at               |
| Fv1           | 2.44 | Friend virus susceptibility 1                                | adaptors/regulators                   | 0.0360 | 1422279_at               |
| Fv1           | 2.44 | Friend virus susceptibility 1                                | unknown                               | 0.0360 | 1422279_at               |
| Cwc22         | 2.48 | CWC22 spliceosome-associated protein homolog (S. cerevisiae) | adaptors/regulators                   | 0.0403 | 1438278_a_at             |
| Clasp2        | 2.51 | <i>CLIP associating protein 2</i>                            | <i>cytoskeleton</i>                   |        | 1427328_a_at, 1456911_at |
| Cdk6          | 2.53 | cyclin-dependent kinase 6                                    | kinases/phosphatases                  | 0.0088 | 1460291_at               |
| Rps19         | 2.55 | ribosomal protein S19                                        | adaptors/regulators                   | 0.0326 | 1460442_at               |
| Acbd4         | 2.56 | acyl-Coenzyme A binding domain containing 4                  | adaptors/regulators                   | 0.0472 | 1449626_s_at             |
| Tfrc          | 2.57 | <i>transferrin receptor</i>                                  | <i>receptors</i>                      | 0.0360 | x57349_3_at, AFFX-TransR |
| Efcab7        | 2.61 | EF-hand calcium binding domain 7                             | unknown                               | 0.0007 | 1451349_at               |
| Lsm12         | 2.67 | LSM12 homolog (S. cerevisiae)                                | unknown                               | 0.0225 | 1429509_at               |
| Gda           | 2.69 | guanine deaminase                                            | enzymes                               | 0.0319 | 1435748_at               |
| Cps1          | 2.82 | carbamoyl-phosphate synthetase 1                             | enzymes                               | 0.0117 | 1455540_at               |
| Rbm39         | 2.91 | <i>RNA binding motif protein 39</i>                          | nucleotide binding                    |        | 1446147_at, 1446148_x_at |
| Abhd1         | 2.92 | abhydrolase domain containing 1                              | enzymes                               | 0.0044 | 1418148_at               |
| Itga9         | 2.94 | integrin alpha 9                                             | receptors                             | 0.0030 | 1460285_at               |
| Ms4a8a        | 2.98 | membrane-spanning 4-domains, subfamily A, member 8A          | receptors                             | 0.0486 | 1418797_at               |
| ---           | 3.04 | (unknown) Transcribed locus, strongly similar to NP_033000.1 | kinases/phosphatases                  | 0.0135 | 1435129_at               |
| Rrm1          | 3.06 | protein tyrosine phosphatase 4a2 [Mus musculus]              | enzymes                               | 0.0158 | 1440073_at               |
| Ncl           | 3.14 | ribonucleotide reductase M1                                  | enzymes                               | 0.0177 | 1442404_at               |
|               |      | nucleolin                                                    | transcription factors                 |        | 1429203_at,              |
| 2410076I21Rik | 3.14 | RIKEN cDNA 2410076I21 gene                                   | unknown                               |        | 1441957_x_at             |
| 4921537I17Rik | 3.31 | RIKEN cDNA 4921537I17 gene                                   | unknown                               | 0.0361 | 1431259_at               |
| Insr          | 3.47 | insulin receptor                                             | receptors                             | 0.0277 | 1421380_at               |
| Atp10d        | 3.59 | ATPase, class V, type 10D                                    | channels/transporters                 | 0.0150 | 1436544_at               |
| Masp2         | 3.60 | mannan-binding lectin serine peptidase 2                     | enzymes                               | 0.0244 | 1420524_a_at             |
| Pldn          | 3.63 | pallidin                                                     | adaptors/regulators                   | 0.0023 | 1457088_at               |

|                                                                                                                                           |       |                                                                                                                                                                                                                                                                                                                                                          |                       |        |                        |
|-------------------------------------------------------------------------------------------------------------------------------------------|-------|----------------------------------------------------------------------------------------------------------------------------------------------------------------------------------------------------------------------------------------------------------------------------------------------------------------------------------------------------------|-----------------------|--------|------------------------|
| 2410018L13Rik ///<br>EG245297 /// EG668553 ///<br>EG668645 /// EG668662 ///<br>EG668701 /// EG668710 ///<br>LOC100043377 ///<br>LOC546752 | 3.72  | RIKEN cDNA 2410018L13 gene /// predicted gene, EG245297 ///<br>similar to neural visinin-like Ca2+-binding protein type 3 ///<br>predicted gene, EG668553 /// predicted gene, EG668645 ///<br>predicted gene, EG668662 /// predicted gene, EG668701 ///<br>predicted gene, EG668710 /// similar to development and<br>differentiation enhancing factor 2 | unknown               | 0.0032 | 1439113_at             |
| <i>Wdfy1</i>                                                                                                                              | 3.83  | integrin alpha 4 /// ceramide kinase-like                                                                                                                                                                                                                                                                                                                | receptors             | 0.0311 | 1456498_at             |
| OTTMUSG00000010173                                                                                                                        | 3.93  | <i>WD repeat and FYVE domain containing 1</i>                                                                                                                                                                                                                                                                                                            | adaptors/regulators   |        | 1435588_at, 1437358_at |
| Ddx39                                                                                                                                     | 3.95  | Predicted gene, OTTMUSG00000010173                                                                                                                                                                                                                                                                                                                       | unknown               | 0.0220 | 1439065_x_at           |
| Tmem184a                                                                                                                                  | 4.46  | DEAD (Asp-Glu-Ala-Asp) box polypeptide 39                                                                                                                                                                                                                                                                                                                | enzymes               | 0.0070 | 1438287_x_at           |
| Ap1s3                                                                                                                                     | 4.57  | transmembrane protein 184a                                                                                                                                                                                                                                                                                                                               | unknown               | 0.0131 | 1424477_at             |
| Cyct                                                                                                                                      | 5.10  | adaptor-related protein complex AP-1, sigma 3                                                                                                                                                                                                                                                                                                            | channels/transporters | 0.0015 | 1455735_at             |
| Calm13                                                                                                                                    | 5.26  | cytochrome c, testis                                                                                                                                                                                                                                                                                                                                     | adaptors/regulators   | 0.0462 | 1450752_at             |
| Tmem87a                                                                                                                                   | 5.57  | calmodulin-like 3                                                                                                                                                                                                                                                                                                                                        | adaptors/regulators   | 0.0148 | 1418608_at             |
| <i>Cap1</i>                                                                                                                               | 6.85  | transmembrane protein 87A                                                                                                                                                                                                                                                                                                                                | unknown               | 0.0044 | 1424454_at             |
| Defb10                                                                                                                                    | 7.21  | <i>CAP, adenylate cyclase-associated protein 1 (yeast)</i>                                                                                                                                                                                                                                                                                               | <i>cytoskeleton</i>   |        | 1417461_at, 1417462_at |
| Ttll4                                                                                                                                     | 8.19  | defensin beta 10                                                                                                                                                                                                                                                                                                                                         | adaptors/regulators   | 0.0090 | 1427775_at             |
| Npvf                                                                                                                                      | 8.95  | tubulin tyrosine ligase-like family, member 4                                                                                                                                                                                                                                                                                                            | enzymes               | 0.0001 | 1459031_at             |
| Hba-a1 /// Hba-a2                                                                                                                         | 10.18 | neuropeptide VF precursor                                                                                                                                                                                                                                                                                                                                | ligands               | 0.0459 | 1421686_at             |
| BC023969                                                                                                                                  | 10.59 | hemoglobin alpha, adult chain 1 /// hemoglobin alpha, adult chain 2                                                                                                                                                                                                                                                                                      | channels/transporters | 0.0096 | 1417714_x_at           |
| Tcte3                                                                                                                                     | 11.18 | cDNA sequence BC023969                                                                                                                                                                                                                                                                                                                                   | unknown               | 0.0002 | 1445226_at             |
| H2-D1                                                                                                                                     | 12.18 | t-complex-associated testis expressed 3                                                                                                                                                                                                                                                                                                                  | adaptors/regulators   | 0.0342 | 1421682_a_at           |
| Pabpc5                                                                                                                                    | 13.27 | histocompatibility 2, D region locus 1                                                                                                                                                                                                                                                                                                                   | receptors             | 0.0136 | 1450170_x_at           |
| OTTMUSG00000005148                                                                                                                        | 13.79 | poly A binding protein, cytoplasmic 5                                                                                                                                                                                                                                                                                                                    | nucleotide binding    | 0.0236 | 1446162_at             |
| LOC100044383 /// Pnpt1                                                                                                                    | 14.13 | predicted gene, OTTMUSG00000005148                                                                                                                                                                                                                                                                                                                       | unknown               | 0.0081 | 1455973_at             |
| AI506816                                                                                                                                  | 19.57 | polyribonucleotide nucleotidyltransferase 1 /// similar to<br>polynucleotide phosphorylase-like protein                                                                                                                                                                                                                                                  | enzymes               | 0.0392 | 1452677_at             |
| Ccnb1ip1                                                                                                                                  | 32.28 | expressed sequence AI506816                                                                                                                                                                                                                                                                                                                              | unknown               | 0.0271 | 1439483_at             |
|                                                                                                                                           | 32.47 | cyclin B1 interacting protein 1                                                                                                                                                                                                                                                                                                                          | enzymes               | 0.0363 | 1435998_at             |

**Supplementary Fig. 1. Complete Gene List.** This table contains all of the transcripts regulated downstream of Hand2. Genes listed in *italics* were detected by multiple probe sets. The reported fold change for these genes is the average value.
